# Supplementary material for: Study of the interaction of folic acid-modified gold nanorods and fibrinogen through microfluidics: implications for protein adsorption, incorporation and viability of cancer cells
Source: Royal Society of Chemistry journal article supplement (doi:10.1039/d1nr03179a), 2021-01-01
Supplement: d1nr03179a1.pdf [file d1nr03179a1.pdf]

## Supporting Information

### Study of the Interaction of Folic Acid-modified Gold Nanorods and Fibrinogen through Microfluidics: Implications on Protein Adsorption, Incorporation and Viability of Cancer Cells

*Nacaroha Orellana,<sup>a</sup> Sujei Palma,<sup>a,b,d</sup> Estefania Torres,<sup>a</sup> María Luisa Cordero,<sup>c</sup> Valentina Vio,<sup>b,d</sup> Juan M. Ruso,<sup>e</sup> Josué Juárez,<sup>f</sup> Antonio Topete,<sup>g</sup> Eyleen Araya,<sup>h</sup> Rodrigo Vasquez-Contreras,<sup>b,d,h</sup> Marcelo J. Kogan,<sup>b,d\*</sup> and Natalia Hassan<sup>a,d\*</sup>*

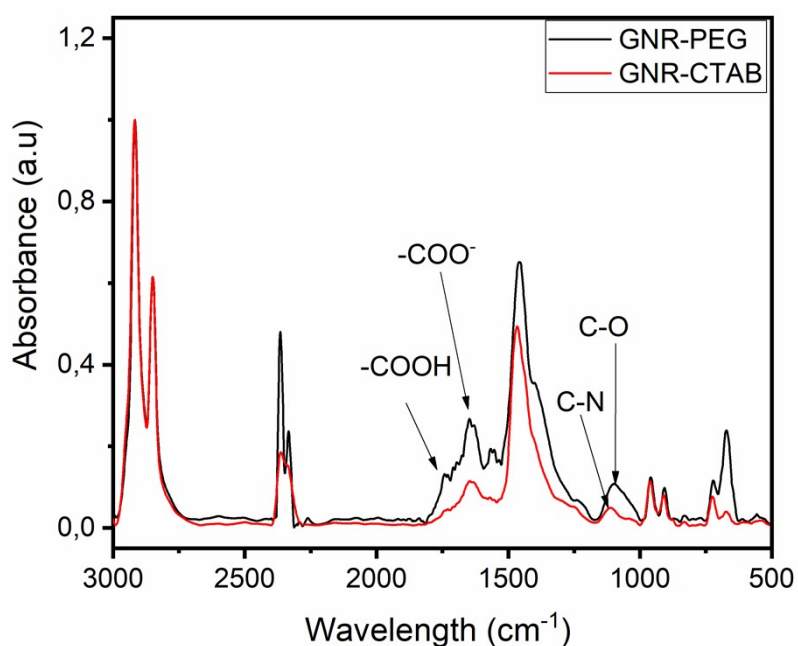

Figure S-1: FTIR spectra of functionalization of GNR-CTAB with SH-PEG-COOH and SH-PEG-OMe.

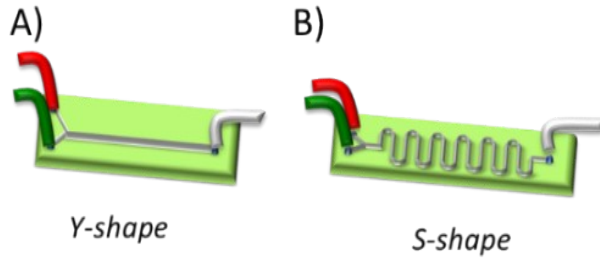

Figure S-2. Microchips in their different conformations. Y-shape, B) S-shape.

|                                                 | Size (d.nm):         | % Intensity: | St Dev (d.nm): |
|-------------------------------------------------|----------------------|--------------|----------------|
| <b>Z-Average (d.nm):</b> 7,031                  | <b>Peak 1:</b> 1,435 | 51,3         | 0,4332         |
| <b>Pdl:</b> 0,407                               | <b>Peak 2:</b> 39,76 | 48,7         | 16,18          |
| <b>Intercept:</b> 0,650                         | <b>Peak 3:</b> 0,000 | 0,0          | 0,000          |
| <b>Result quality :</b> Refer to quality report |                      |              |                |

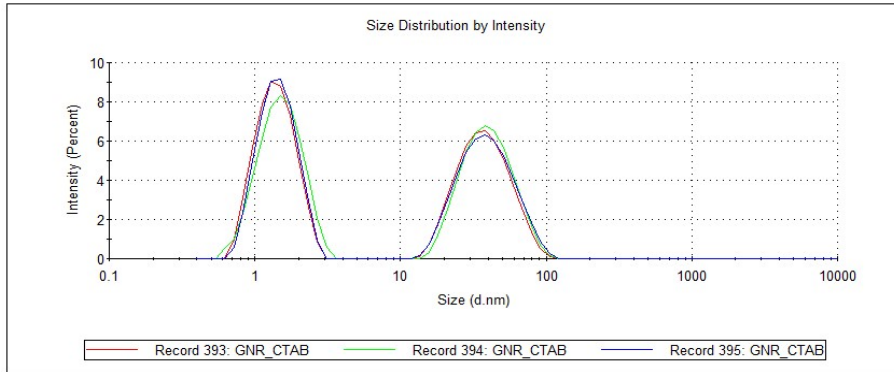

Figure S-3: Hydrodynamic diameters of GNR-CTAB.

|                                                 | Size (d.nm):         | % Intensity: | St Dev (d.nm): |
|-------------------------------------------------|----------------------|--------------|----------------|
| <b>Z-Average (d.nm):</b> 8,148                  | <b>Peak 1:</b> 3,579 | 54,1         | 0,9913         |
| <b>Pdl:</b> 0,415                               | <b>Peak 2:</b> 59,47 | 45,9         | 23,14          |
| <b>Intercept:</b> 0,710                         | <b>Peak 3:</b> 0,000 | 0,0          | 0,000          |
| <b>Result quality :</b> Refer to quality report |                      |              |                |

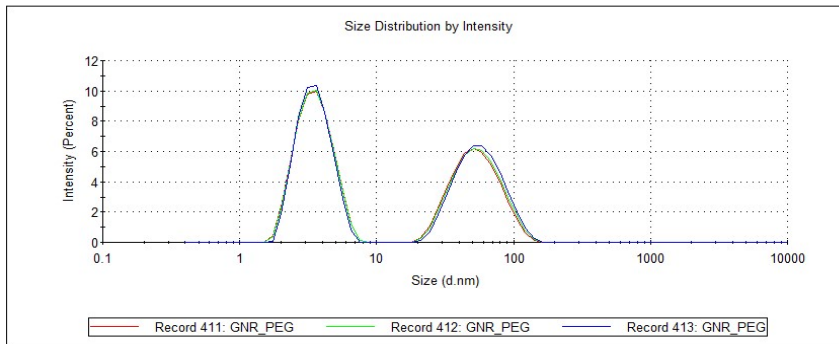

Figure S-4: Hydrodynamic diameters of GNR-PEG.

**Z-Average (d.nm):** 10,20      **Peak 1:** 74,46      **% Intensity:** 53,1      **St Dev (d.nm):** 35,10  
**Pdl:** 0,508      **Peak 2:** 3,437      46,9      0,9310  
**Intercept:** 0,730      **Peak 3:** 0,000      0,0      0,000  
**Result quality :** Refer to quality report

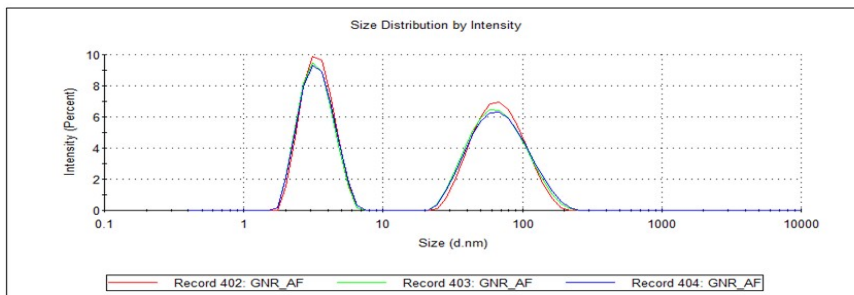

Figure S-5: Hydrodynamic diameters of GNR-PEG-FA.

**Z-Average (d.nm):** 9,398      **Peak 1:** 60,84      **% Intensity:** 52,2      **St Dev (d.nm):** 24,24  
**Pdl:** 0,472      **Peak 2:** 3,297      47,8      0,8586  
**Intercept:** 0,729      **Peak 3:** 0,000      0,0      0,000  
**Result quality :** Refer to quality report

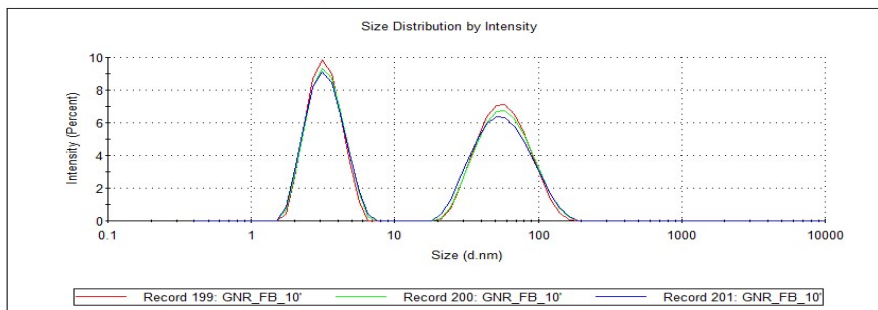

Figure S-6: Hydrodynamic diameters of GNR-FB-10'.

|                                | Size (d.nm):         | % Intensity: | St Dev (d.nm): |
|--------------------------------|----------------------|--------------|----------------|
| <b>Z-Average (d.nm):</b> 10,58 | <b>Peak 1:</b> 71,43 | 54,7         | 37,43          |
| <b>Pdl:</b> 0,521              | <b>Peak 2:</b> 3,387 | 45,3         | 1,032          |
| <b>Intercept:</b> 0,733        | <b>Peak 3:</b> 0,000 | 0,0          | 0,000          |

**Result quality :** Refer to quality report

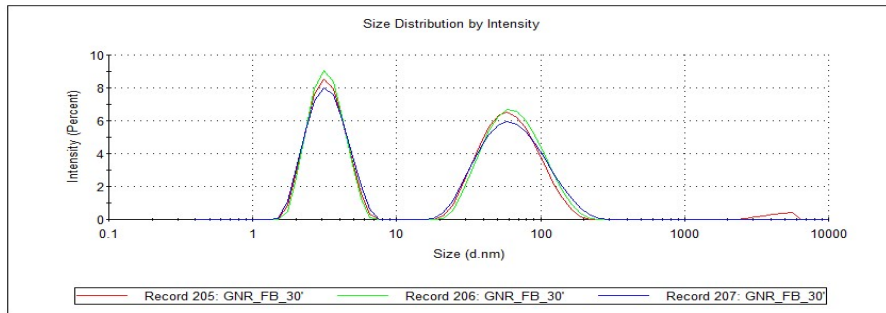

Figure S-7: Hydrodynamic diameters of GNR-FB-30'

|                                | Size (d.nm):         | % Intensity: | St Dev (d.nm): |
|--------------------------------|----------------------|--------------|----------------|
| <b>Z-Average (d.nm):</b> 14,77 | <b>Peak 1:</b> 87,19 | 60,5         | 36,36          |
| <b>Pdl:</b> 0,684              | <b>Peak 2:</b> 3,845 | 37,6         | 1,096          |
| <b>Intercept:</b> 0,713        | <b>Peak 3:</b> 4629  | 1,9          | 815,1          |

**Result quality :** Refer to quality report

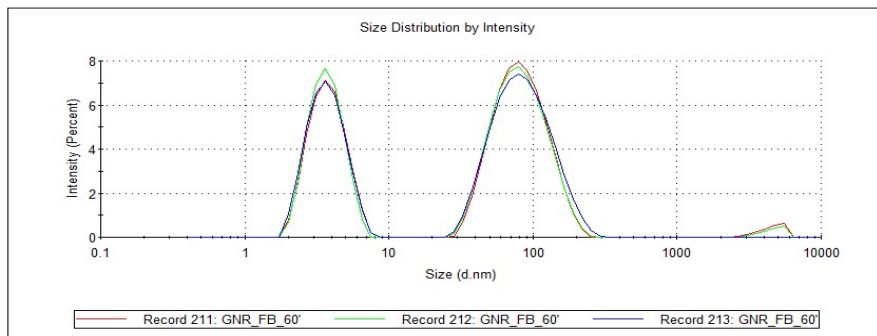

Figure S-8: Hydrodynamic diameters of GNR-FB-60'.

|                                | Size (d.nm):         | % Intensity: | St Dev (d.nm): |
|--------------------------------|----------------------|--------------|----------------|
| <b>Z-Average (d.nm):</b> 8,459 | <b>Peak 1:</b> 3,406 | 51,0         | 1,090          |
| <b>Pdl:</b> 0,430              | <b>Peak 2:</b> 56,97 | 49,0         | 25,36          |
| <b>Intercept:</b> 0,727        | <b>Peak 3:</b> 0,000 | 0,0          | 0,000          |

**Result quality :** Refer to quality report

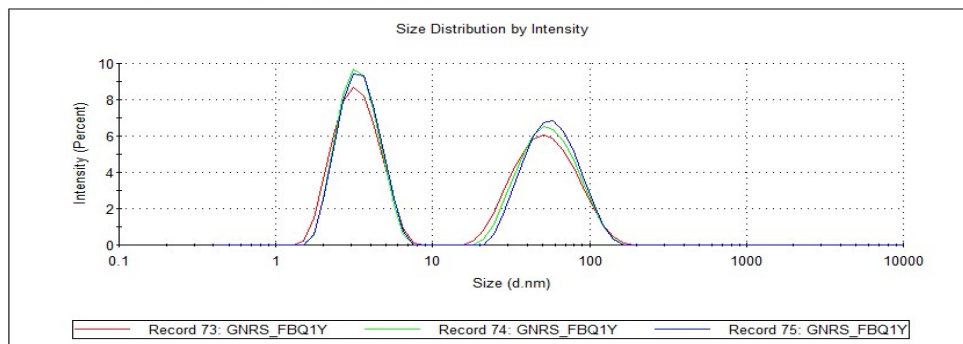

Figure S-9: Hydrodynamic diameters of GNR-FB Q<sub>1</sub>Y

|                                | Size (d.nm):         | % Intensity: | St Dev (d.nm): |
|--------------------------------|----------------------|--------------|----------------|
| <b>Z-Average (d.nm):</b> 10,79 | <b>Peak 1:</b> 74,66 | 54,4         | 36,19          |
| <b>Pdl:</b> 0,519              | <b>Peak 2:</b> 3,792 | 45,6         | 1,060          |
| <b>Intercept:</b> 0,667        | <b>Peak 3:</b> 0,000 | 0,0          | 0,000          |

**Result quality :** Refer to quality report

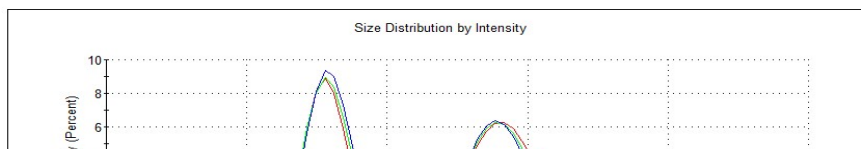

|                                | Size (d.nm):         | % Intensity: | St Dev (d.nm): |
|--------------------------------|----------------------|--------------|----------------|
| <b>Z-Average (d.nm):</b> 13,06 | <b>Peak 1:</b> 90,84 | 52,1         | 43,87          |
| <b>Pdl:</b> 0,601              | <b>Peak 2:</b> 4,596 | 44,0         | 1,246          |
| <b>Intercept:</b> 0,725        | <b>Peak 3:</b> 3869  | 3,9          | 1126           |

**Result quality :** Refer to quality report

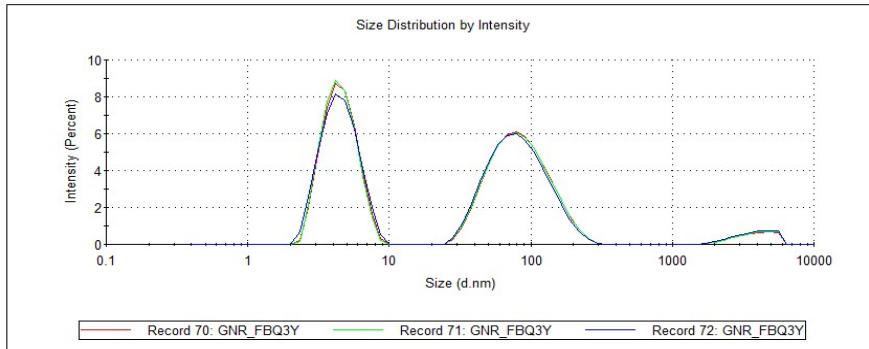

Figure S-11: Hydrodynamic diameters of GNR-FB Q<sub>3</sub>Y

|                                | Size (d.nm):         | % Intensity: | St Dev (d.nm): |
|--------------------------------|----------------------|--------------|----------------|
| <b>Z-Average (d.nm):</b> 10,51 | <b>Peak 1:</b> 77,09 | 49,7         | 40,68          |
| <b>Pdl:</b> 0,495              | <b>Peak 2:</b> 4,372 | 49,1         | 1,310          |
| <b>Intercept:</b> 0,739        | <b>Peak 3:</b> 4100  | 1,1          | 1046           |

**Result quality :** Refer to quality report

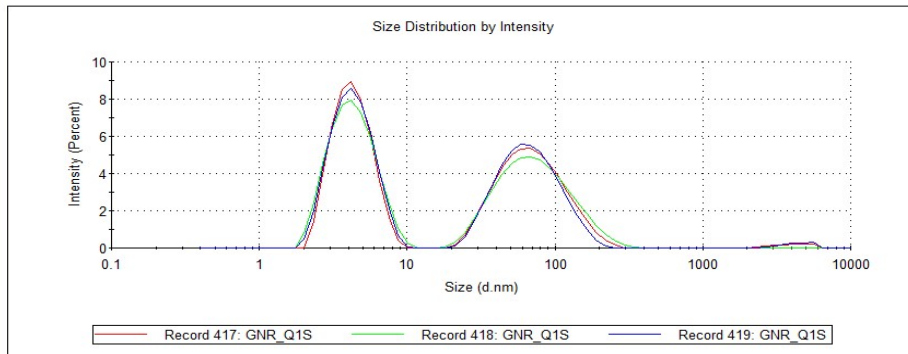

Figure S-12: Hydrodynamic diameters of GNR-FB Q<sub>1</sub>S

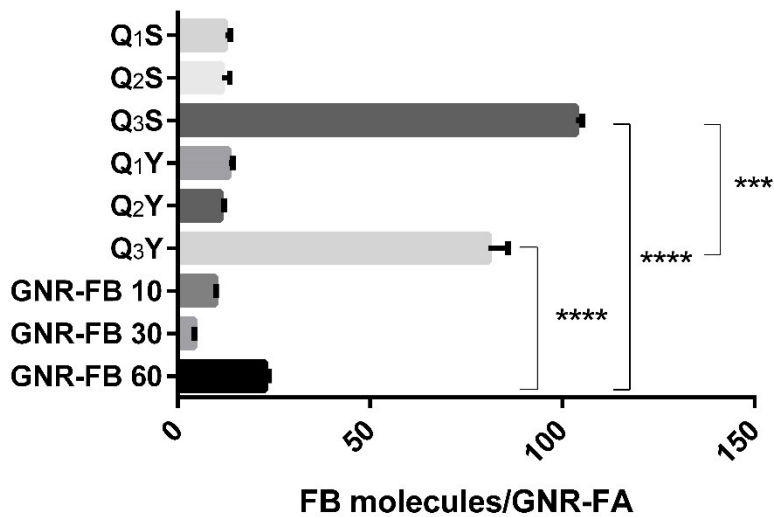

Figure S-13: Statistical analysis of FB molecules per GNR-FA obtained by TEM images analysis. \*\*\*\*p < 0.0001, \*\*\*p < 0.0003 related to the comparison of bulk 60', Q<sub>3</sub>Y and Q<sub>3</sub>S.

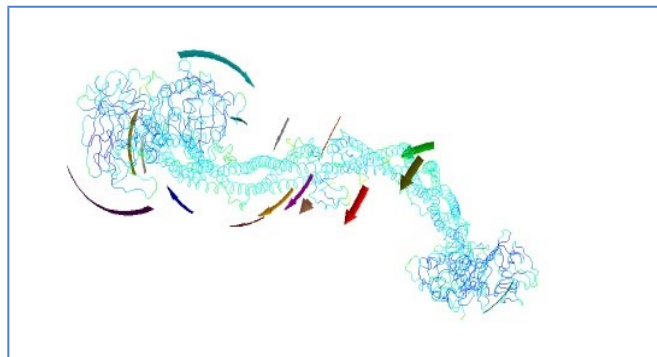

Figure S-14: Scheme of the movements (elasticity) of the fibrinogen based on the fluctuations size of the slowest vibration-modes of the protein. (The colored arrows indicate the fibrinogen movements directions).

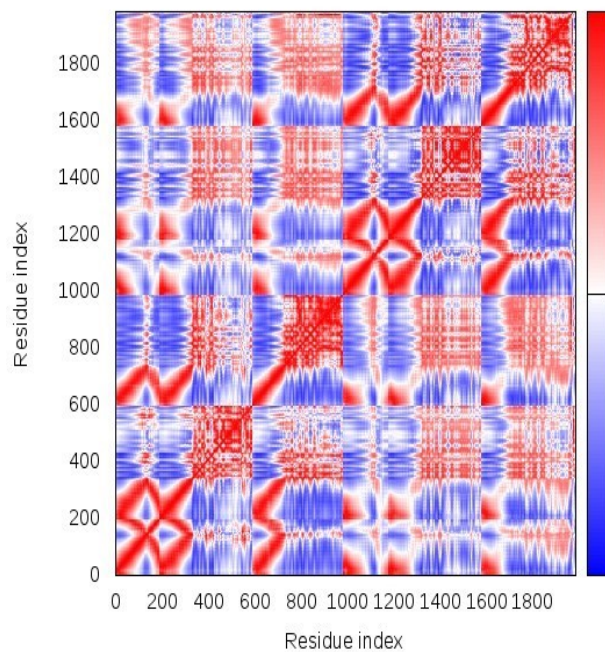

Figure S-15. Matrix cross-correlation maps of flexibility of chain N of FB showing the correlations between residue fluctuations which are plotted like a function of  $i$  vs  $j$  residue together with the corresponding flexibility perturbation in the 3D crystallographic chain (red positive correlation, blue negative correlation).

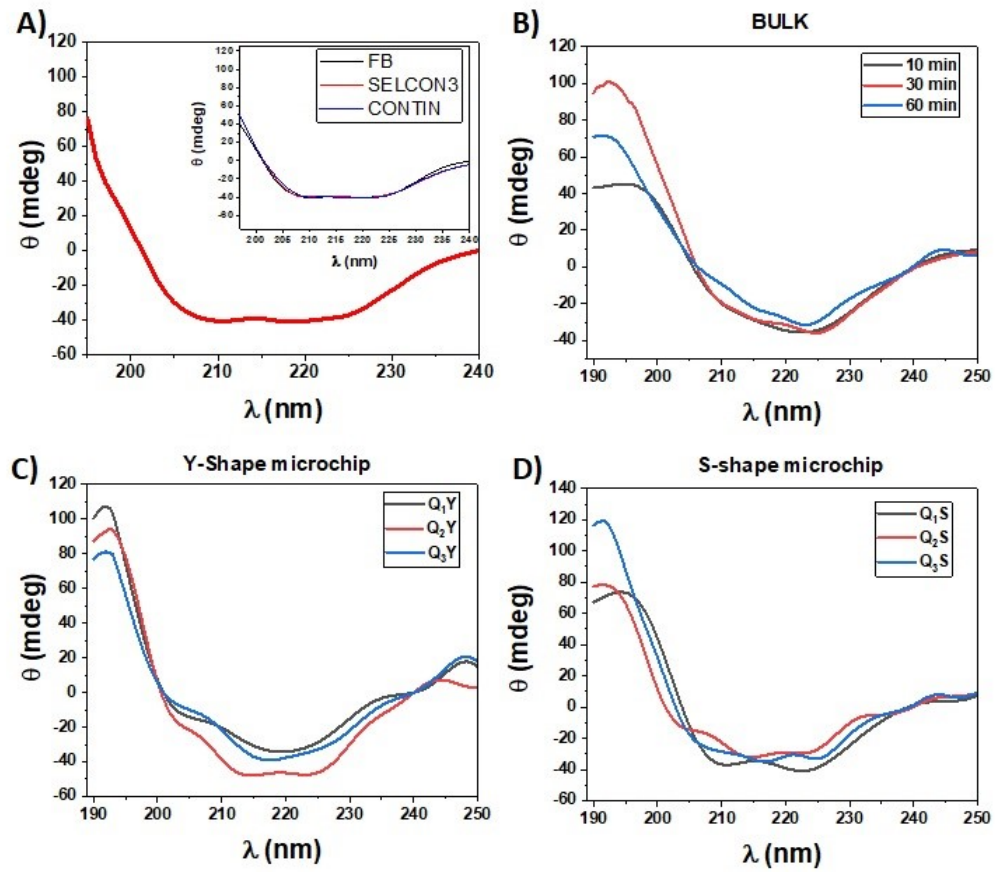

Figure S-16: Circular dichroism spectra of A) Fibrinogen, inset SELCON3 and CONTIN analysis. B) bulk experiments at 10, 30 and 60 min, C) Y-shape experiments, D) S-shape experiments.
